# Supplementary material for: Randomized phase II study of stereotactic body radiotherapy and interleukin-2 versus interleukin-2 in patients with metastatic melanoma
Source: PubMed Central journal article supplement (PMC7259841; doi:10.1136/jitc-2020-000773), 2020-05-27
Supplement: jitc-2020-000773supp002.pdf [file jitc-2020-000773supp002.pdf]

Supplementary Table 1 Univariate and Multivariable analysis examining the predictors of response (CR/PR/SD) using logistical regression.

|                                                | Univariate Analysis |              |              |         | Multivariable Analysis |              |              |         |
|------------------------------------------------|---------------------|--------------|--------------|---------|------------------------|--------------|--------------|---------|
|                                                | OR*                 | Lower 95% CI | Upper 95% CI | p-value | OR*                    | Lower 95% CI | Upper 95% CI | p-value |
| Group                                          |                     |              |              |         |                        |              |              |         |
| IL-2 and crossover                             | Reference           |              |              |         | Reference              |              |              |         |
| SBRT + IL-2                                    | 2                   | 0.55         | 7.24         | 0.29    | 1.44                   | 0.17         | 12.45        | 0.74    |
| Age at diagnosis, years                        | 1.02                | 0.97         | 1.08         | 0.37    | 1.05                   | 0.96         | 1.15         | 0.29    |
| LDH value with log <sub>2</sub> transform, U/L | 0.5                 | 0.23         | 1.10         | 0.08    | 0.44                   | 0.12         | 1.65         | 0.22    |
| Total Tumor Burden Baseline, cm                | 0.98                | 0.93         | 1.03         | 0.40    |                        |              |              |         |
| Total Tumor Burden Nadir Increase, cm          | 0.85                | 0.77         | 0.94         | 0.002   | 0.88                   | 0.8          | 0.96         | 0.01    |
| Gender                                         |                     |              |              |         |                        |              |              |         |
| Female                                         | Reference           |              |              |         |                        |              |              |         |
| Male                                           | 1.6                 | 0.37         | 6.92         | 0.53    |                        |              |              |         |
| BRAF Status                                    |                     |              |              |         |                        |              |              |         |
| V600E                                          | Reference           |              |              |         |                        |              |              |         |
| WT                                             | 0.86                | 0.22         | 3.31         | 0.82    |                        |              |              |         |
| Unknown                                        | 3                   | 0.29         | 30.92        | 0.36    |                        |              |              |         |
| *odds ratio of response (CR/PR/SD)             |                     |              |              |         |                        |              |              |         |
