# Supplementary material for: Randomized phase II study of stereotactic body radiotherapy and interleukin-2 versus interleukin-2 in patients with metastatic melanoma
Source: PubMed Central journal article supplement (PMC7259841; doi:10.1136/jitc-2020-000773), 2020-05-27

Figure S1

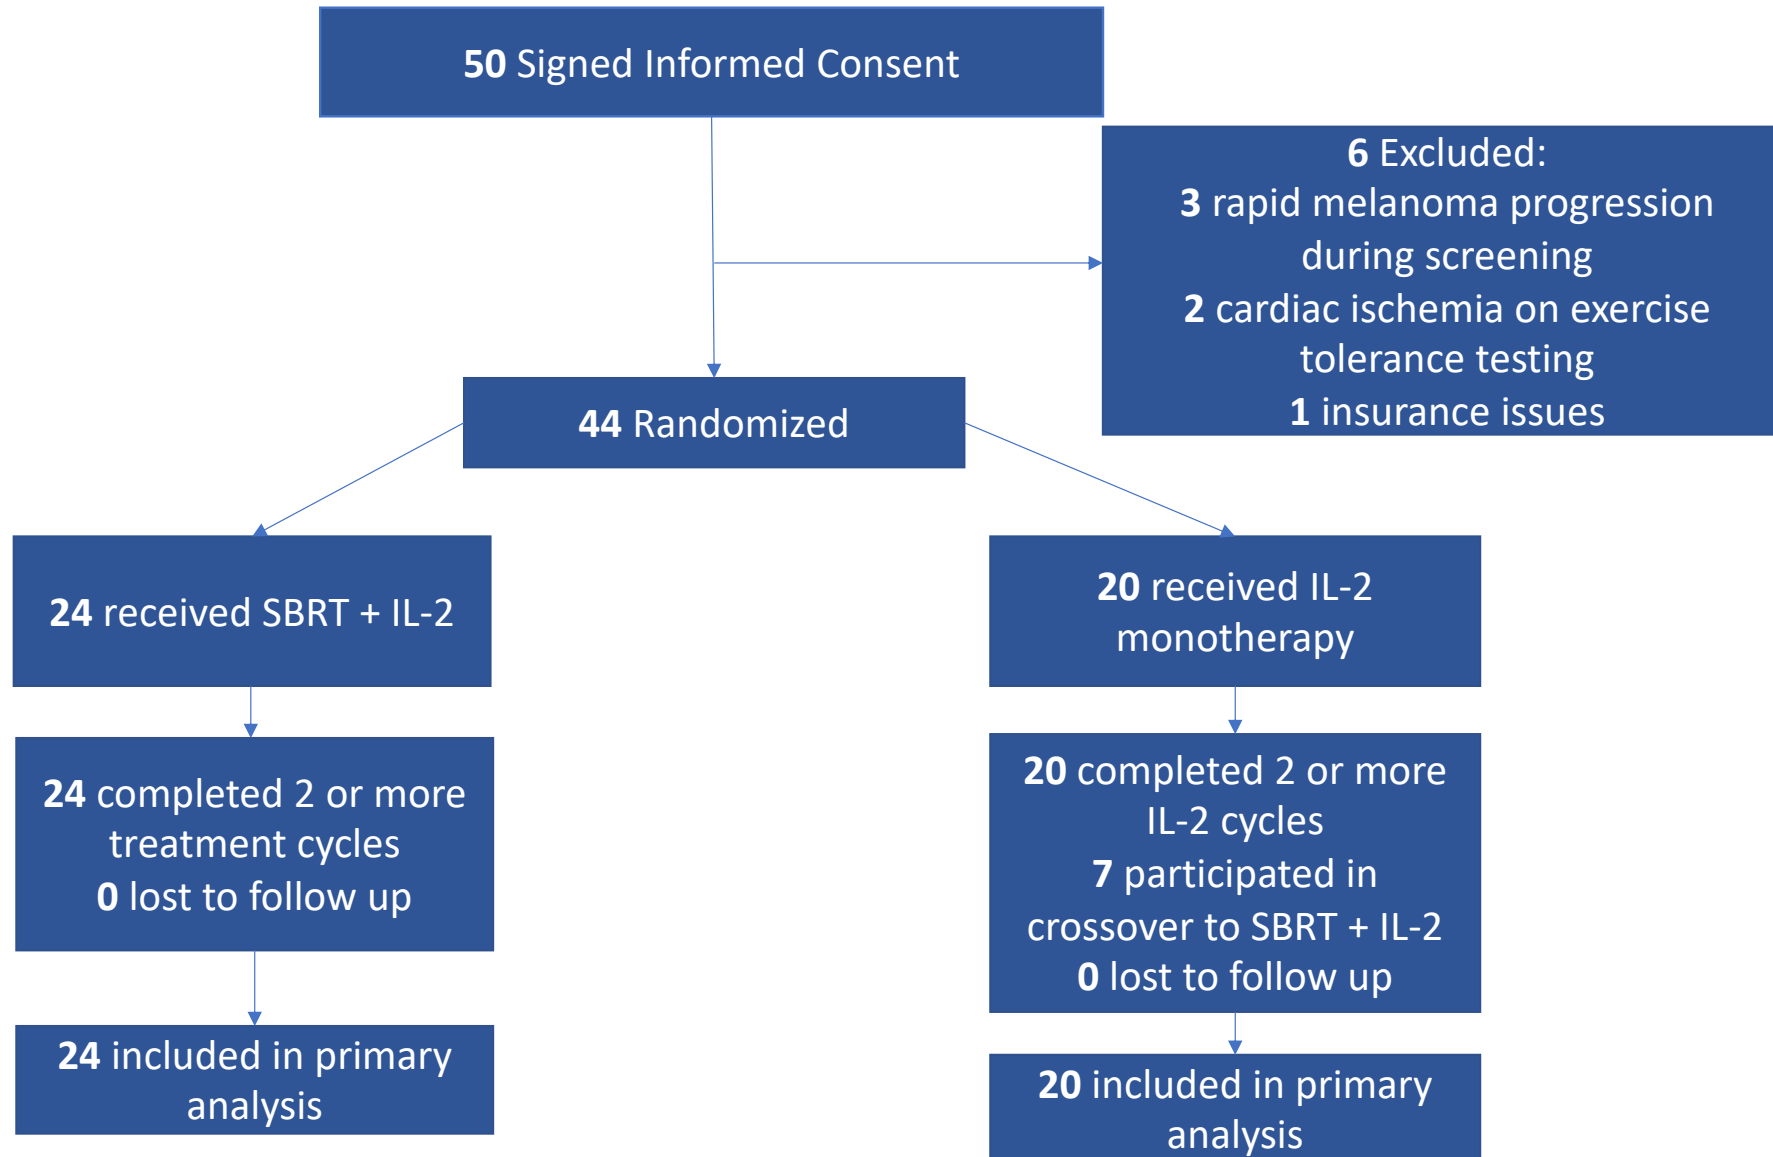

Supplement: jitc-2020-000773supp003.pdf [file jitc-2020-000773supp003.pdf]
